# Supplementary material for: Statistical Method Based on Bayes-Type Empirical Score Test for Assessing Genetic Association with Multilocus Genotype Data
Source: Hindawi journal article supplement (doi:10.1155/2020/4708152), 2020-05-07
Supplement: f1 [file 4708152.f1.pdf]

Supplementary Materials for  
**Statistical Method Based on Bayes-type Empirical Score  
Test for Assessing Genetic Association with Multilocus  
Genotype Data**

Yi Tian<sup>1</sup>, Li Ma<sup>2</sup>, Xiaohong Cai<sup>2</sup>, and Jiayan Zhu<sup>2,\*</sup>

<sup>1</sup> School of Mathematics and Statistics, Central China Normal University, Wuhan, 430079, China

<sup>2</sup> School of Information Engineering, Hubei University of Chinese Medicine, Wuhan, 430065, China

\* Corresponding author: zhujiayan999@163.com

## Contents

1. Derivation of the asymptotic variance estimate for EB score test  $U_B$ .
2. Supplementary Tables and Figures for "Results" section.

## 1. Derivation of the asymptotic variance estimate for EB score test $U_B$ .

Let  $U_{P,k}$  and  $U_{R,k}$  denote the prospective and retrospective likelihood score functions, respectively for  $k = 1, \dots, q$ . We can get,

$$U_{P,k} = \frac{n_1 n_0}{n_1 + n_0} \left[ \frac{1}{n_1} \sum_{i=1}^{n_1} m(G_{ik}) - \frac{1}{n_0} \sum_{j=1}^{n_0} m(G_{jk}) \right], \text{ and } U_{R,k} = \sum_{i=1}^{n_1} \left[ m(G_{ik}) - E_{HWE, \hat{f}_k} [m(g_k)] \right],$$

for  $k = 1, \dots, q$ .

The empirical Bayes score can be expressed as  $U_{B,k} = U_{P,k}(I_{2 \times 2} - W_k) + U_{R,k}W_k$ .

We show that the asymptotic variance of  $U_{B,k}$  can be based on the following "influence function"  $\tilde{U}_{B,k}$ :

$$\begin{aligned} \tilde{U}_{B,k} &= U_{P,k}(I_{2 \times 2} - W_k) + U_{R,k}W_k \\ &= \frac{n_1 n_0}{n} \left[ \frac{1}{n_1} \sum_{i=1}^{n_1} m(G_{ik}) - \frac{1}{n_0} \sum_{j=1}^{n_0} m(G_{jk}) \right] (I_{2 \times 2} - W_k) \\ &+ \left\{ \sum_{i=1}^{n_1} \left[ m(G_{ik}) - E_{HWE, \hat{f}_k} [m(g_k)] \right] - \frac{n_1}{2n} c(f_k) \sum_{i=1}^n [I(G_{ik} = 1) + 2I(G_{ik} = 2) - 2f_k] \right\} W_k, \end{aligned}$$

where  $c(f_k) = \sum_{g_k=0,1,2} \left[ m(g_k) \times \frac{g_k - 2f_k}{f_k(1-f_k)} p_{0g}(f_k) \right]$ ,  $p_{00}(f_k) = (1-f_k)^2$ ,  $p_{01}(f_k) = 2f_k(1-f_k)$  and  $p_{02}(f_k) = f_k^2$ . The rearrangement of the above terms is as follows:

$$\begin{aligned} &\sum_{i=1}^{n_1} \left\{ \frac{n_0}{n} m(G_{ik})(I_{2 \times 2} - W_k) + \left[ m(G_{ik}) - E_{HWE, \hat{f}_k} [m(g_k)] \right] W_k \right. \\ &- \frac{n_1 W_k}{2n} [I(G_{ik} = 1) + 2I(G_{ik} = 2) - 2f_k] c(f_k) W_k \left. \right\} \\ &- \sum_{i=n_1+1}^n \left\{ \frac{n_1}{n} m(G_{ik})(I_{2 \times 2} - W_k) + \frac{n_1}{2n} [I(G_{ik} = 1) + 2I(G_{ik} = 2) - 2f_k] c(f_k) W_k \right\}. \end{aligned}$$

Our actual calculation for estimating the covariance matrix  $V_B$  was based on the covariance of the above  $n \times 2q$  rearranged data.

## 2. Supplementary Tables and Figures

Supplementary Table1 presents brief information about 64 markers from 13 genes in real data analysis. Supplementary Figure1 graphically illustrates LD structures plot for gene NAT2 by using HAPLOVIEW software. Supplementary Figure2a-Figure9b graphically illustrates more simulation results about 5 test.

Supplementary Table 1. Brief information about 64 markers from 13 genes(1)  
 (Source:GWAS(1) and IBC(2)).

|    | CHR | SNP        | BP.position | Locus  | Source |
|----|-----|------------|-------------|--------|--------|
| 1  | 1   | rs2144300  | 228361539   | GALNT2 | 1      |
| 2  | 1   | rs4846914  | 228362314   | GALNT2 | 1      |
| 3  | 8   | rs3779788  | 19847373    | LPL    | 2      |
| 4  | 8   | rs255      | 19856181    | LPL    | 2      |
| 5  | 8   | rs256      | 19856247    | LPL    | 2      |
| 6  | 8   | rs263      | 19857092    | LPL    | 2      |
| 7  | 8   | rs264      | 19857460    | LPL    | 2      |
| 8  | 8   | rs271      | 19857982    | LPL    | 2      |
| 9  | 8   | rs301      | 19861214    | LPL    | 2      |
| 10 | 8   | rs328      | 19864004    | LPL    | 2      |
| 11 | 8   | rs331      | 19864685    | LPL    | 2      |
| 12 | 8   | rs12679834 | 19864713    | LPL    | 2      |
| 13 | 8   | rs3208305  | 19867928    | LPL    | 2      |
| 14 | 8   | rs3735964  | 19868325    | LPL    | 2      |
| 15 | 8   | rs13702    | 19868772    | LPL    | 2      |
| 16 | 8   | rs3916027  | 19869148    | LPL    | 2      |
| 17 | 8   | rs2197089  | 19870653    | LPL    | 1      |
| 18 | 9   | rs3890182  | 106687476   | ABCA1  | 1      |
| 19 | 9   | rs2275544  | 106691033   | ABCA1  | 1      |
| 20 | 9   | rs1883025  | 106704122   | ABCA1  | 1      |

Supplementary Table 1. Brief information about 64 markers from 13 genes(2)  
 (Source:GWAS(1) and IBC(2)).

|    |    |            |          |      |   |
|----|----|------------|----------|------|---|
| 21 | 15 | rs11635491 | 56507033 | LIPC | 2 |
| 22 | 15 | rs1800588  | 56510967 | LIPC | 2 |
| 23 | 15 | rs2070895  | 56511231 | LIPC | 2 |
| 24 | 15 | rs8034802  | 56512084 | LIPC | 2 |
| 25 | 15 | rs8033940  | 56512134 | LIPC | 2 |
| 26 | 15 | rs261332   | 56514617 | LIPC | 2 |
| 27 | 15 | rs588136   | 56517790 | LIPC | 2 |
| 28 | 15 | rs261341   | 56518859 | LIPC | 2 |
| 29 | 15 | rs261338   | 56522297 | LIPC | 2 |
| 30 | 16 | rs13306677 | 55483696 | CETP | 1 |
| 31 | 16 | rs6499861  | 55548996 | CETP | 2 |
| 32 | 16 | rs6499863  | 55549518 | CETP | 2 |
| 33 | 16 | rs12708967 | 55550712 | CETP | 2 |
| 34 | 16 | rs3764261  | 55550825 | CETP | 1 |
| 35 | 16 | rs12720918 | 55551713 | CETP | 2 |
| 36 | 16 | rs17231506 | 55552029 | CETP | 2 |
| 37 | 16 | rs4783961  | 55552395 | CETP | 2 |
| 38 | 16 | rs1800775  | 55552737 | CETP | 2 |
| 39 | 16 | rs711752   | 55553712 | CETP | 2 |
| 40 | 16 | rs708272   | 55553789 | CETP | 2 |

Supplementary Table 1. Brief information about 64 markers from 13 genes(3)  
 (Source:GWAS(1) and IBC(2)).

|    |    |            |          |      |   |
|----|----|------------|----------|------|---|
| 41 | 16 | rs1864163  | 55554734 | CETP | 2 |
| 42 | 16 | rs7203984  | 55556759 | CETP | 2 |
| 43 | 16 | rs11508026 | 55556829 | CETP | 2 |
| 44 | 16 | rs12720922 | 55558386 | CETP | 2 |
| 45 | 16 | rs9939224  | 55560233 | CETP | 2 |
| 46 | 16 | rs11076174 | 55560647 | CETP | 2 |
| 47 | 16 | rs1532625  | 55562802 | CETP | 2 |
| 48 | 16 | rs1532624  | 55562980 | CETP | 2 |
| 49 | 16 | rs11076175 | 55563879 | CETP | 2 |
| 50 | 16 | rs7499892  | 55564091 | CETP | 2 |
| 51 | 16 | rs11076176 | 55564947 | CETP | 2 |
| 52 | 16 | rs289714   | 55564952 | CETP | 2 |
| 53 | 16 | rs5880     | 55572592 | CETP | 2 |
| 54 | 16 | rs1800777  | 55574820 | CETP | 2 |
| 55 | 16 | rs2292318  | 66543207 | LCAT | 1 |
| 56 | 16 | rs255052   | 66582496 | LCAT | 1 |
| 57 | 18 | rs1943981  | 45423813 | LIPG | 1 |
| 58 | 18 | rs2156552  | 45435666 | LIPG | 1 |

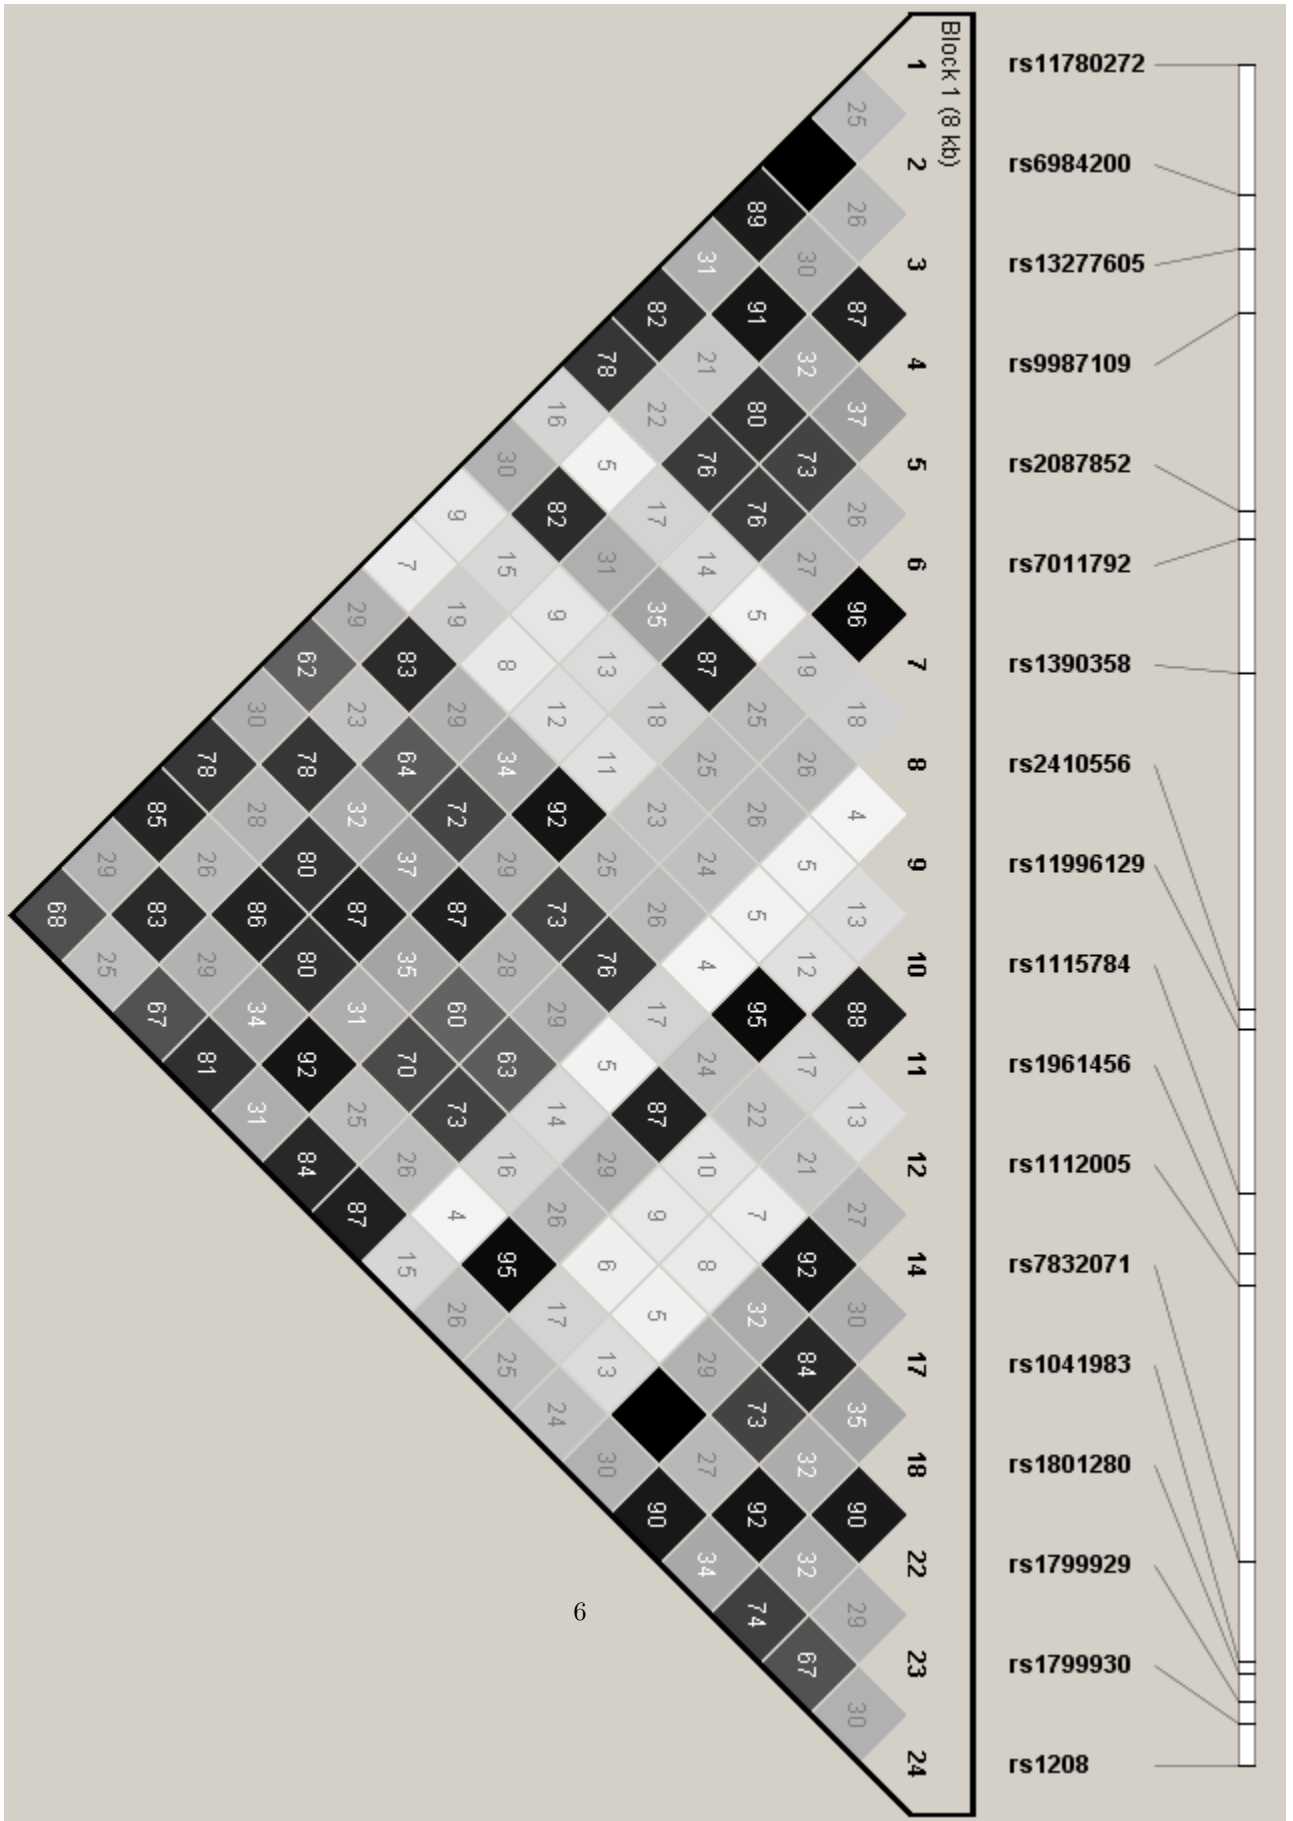

Figure 1. LD Plot of 18 SNPs within the Gene NAT2 by HAPLOVIEW software.

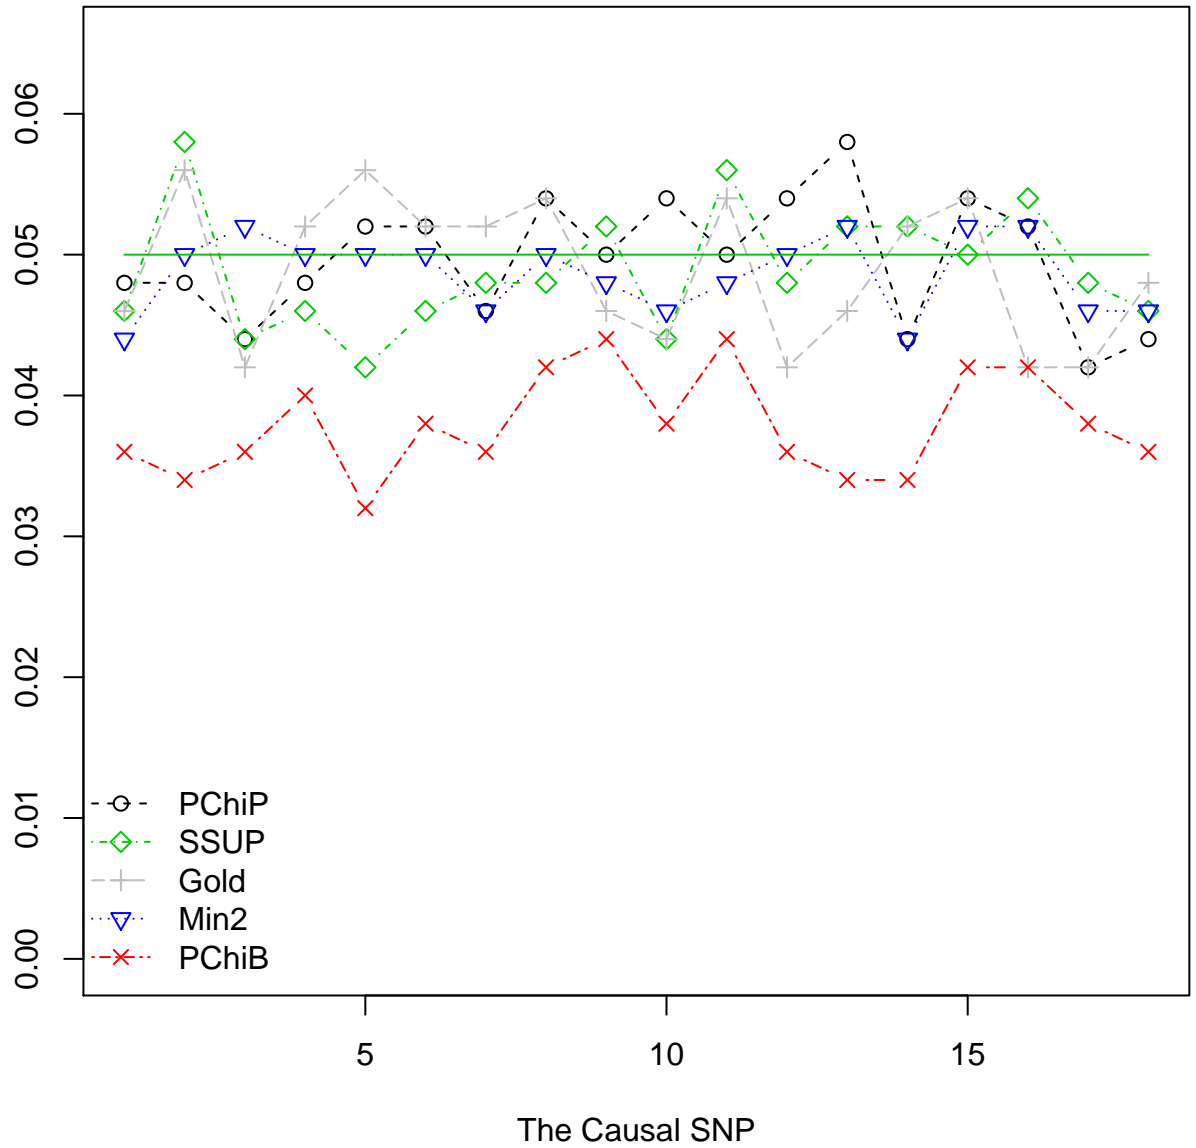

Figure 2a. Empirical null hypothesis rejection rates(based on 17 SNPs excluding the causal SNP) of GOLD, PChiP, SSUP, PChiB and Min2. Each SNP is treated as the causal locus in turn, which has a additive effect with simulated odds ratios 1.0 and  $F_{st}=0$  based on 1000 controls, 1000 cases and 500 iterations.

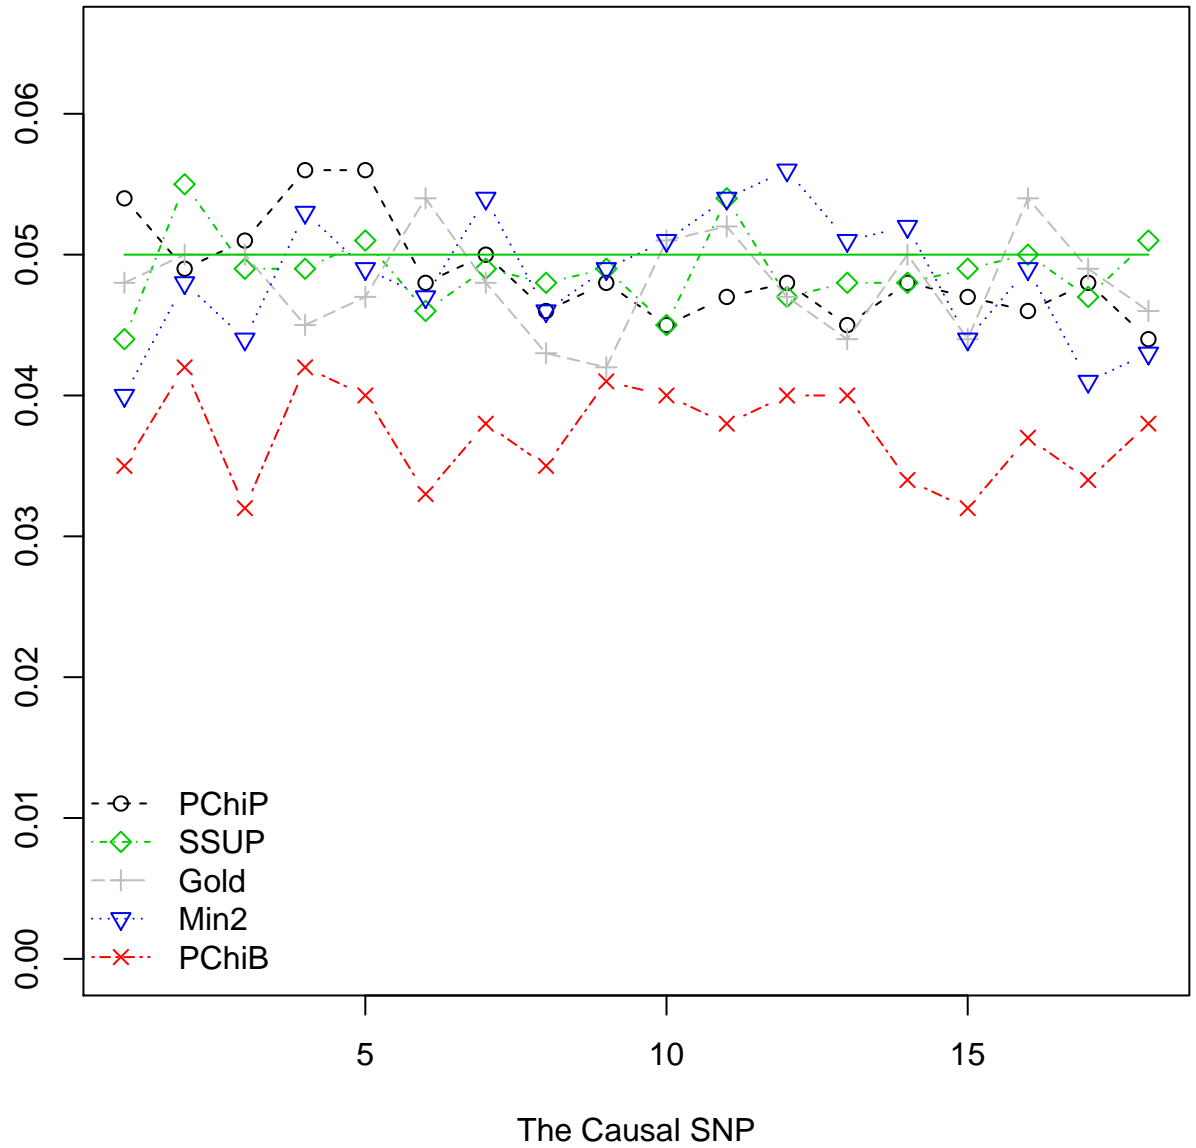

Figure 2b. Empirical null hypothesis rejection rates(based on 5 tag labeled SNPs) of GOLD, PChiP, SSUP, PChiB and Min2. Each SNP is treated as the causal locus in turn, which has a additive effect with simulated odds ratios 1.0 and  $F_{st}=0$  based on 1000 controls, 1000 cases and 500 iterations.



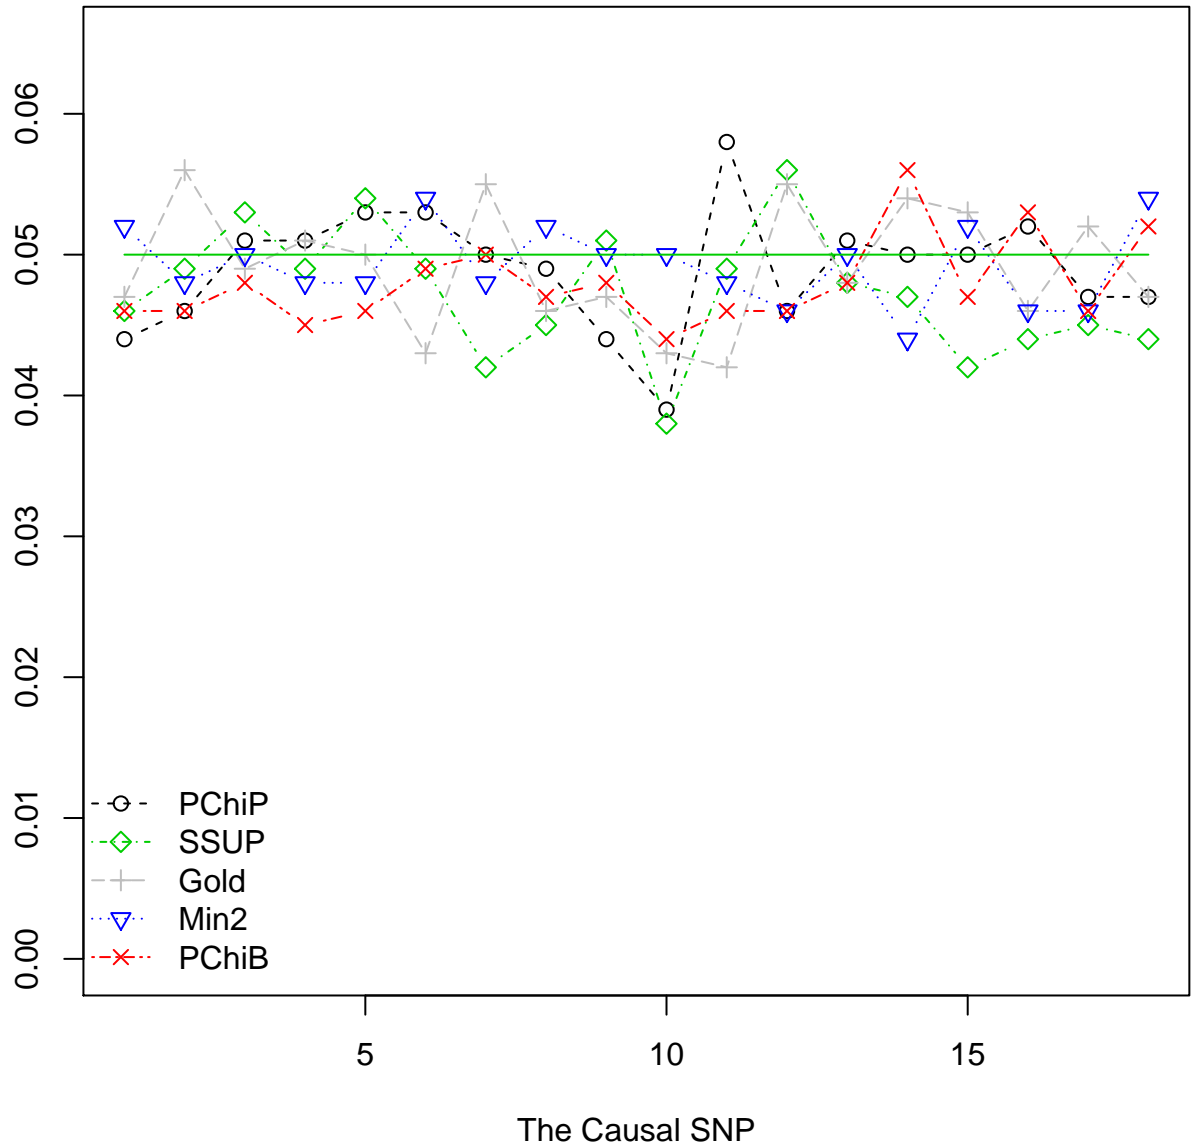

Figure 3a. Empirical null hypothesis rejection rates(based on 17 SNPs excluding the causal SNP) of GOLD, PChiP, SSUP, PChiB and Min2. Each SNP is treated as the causal locus in turn, which has a additive effect with simulated odds ratios 1.0 and  $F_{st}=0.5\log(2.0)$  based on 1000 controls, 1000 cases and 500 iterations.

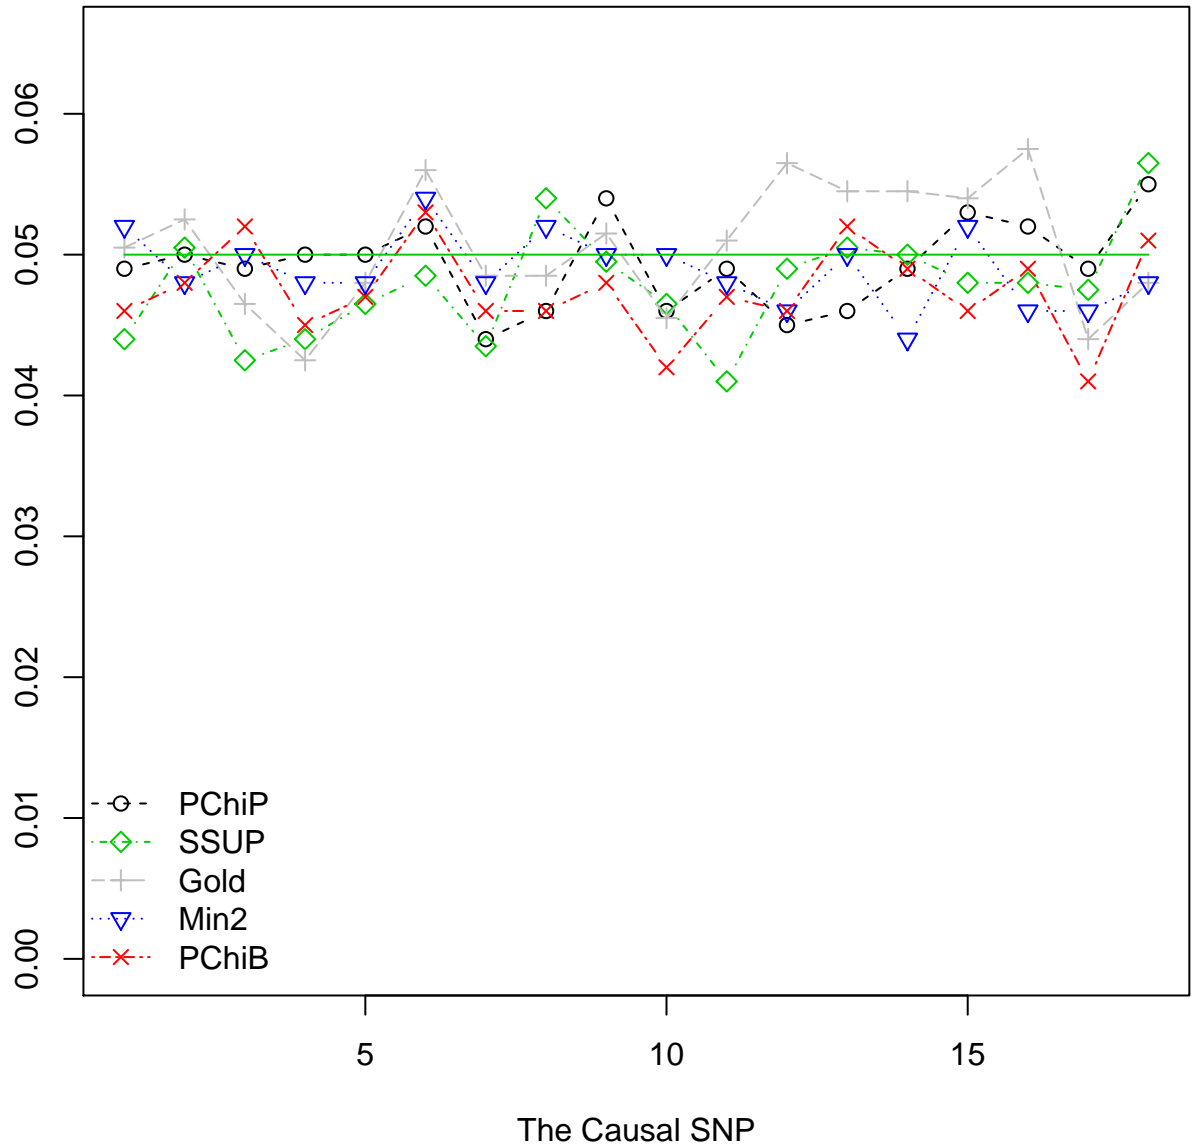

Figure 3b. Empirical null hypothesis rejection rates(based on 5 tag labeled SNPs) of GOLD, PChiP, SSUP, PChiB and Min2. Each SNP is treated as the causal locus in turn, which has a additive effect with simulated odds ratios 1.0 and  $F_{st}=0.5\log(2.0)$  based on 1000 controls, 1000 cases and 500 iterations.

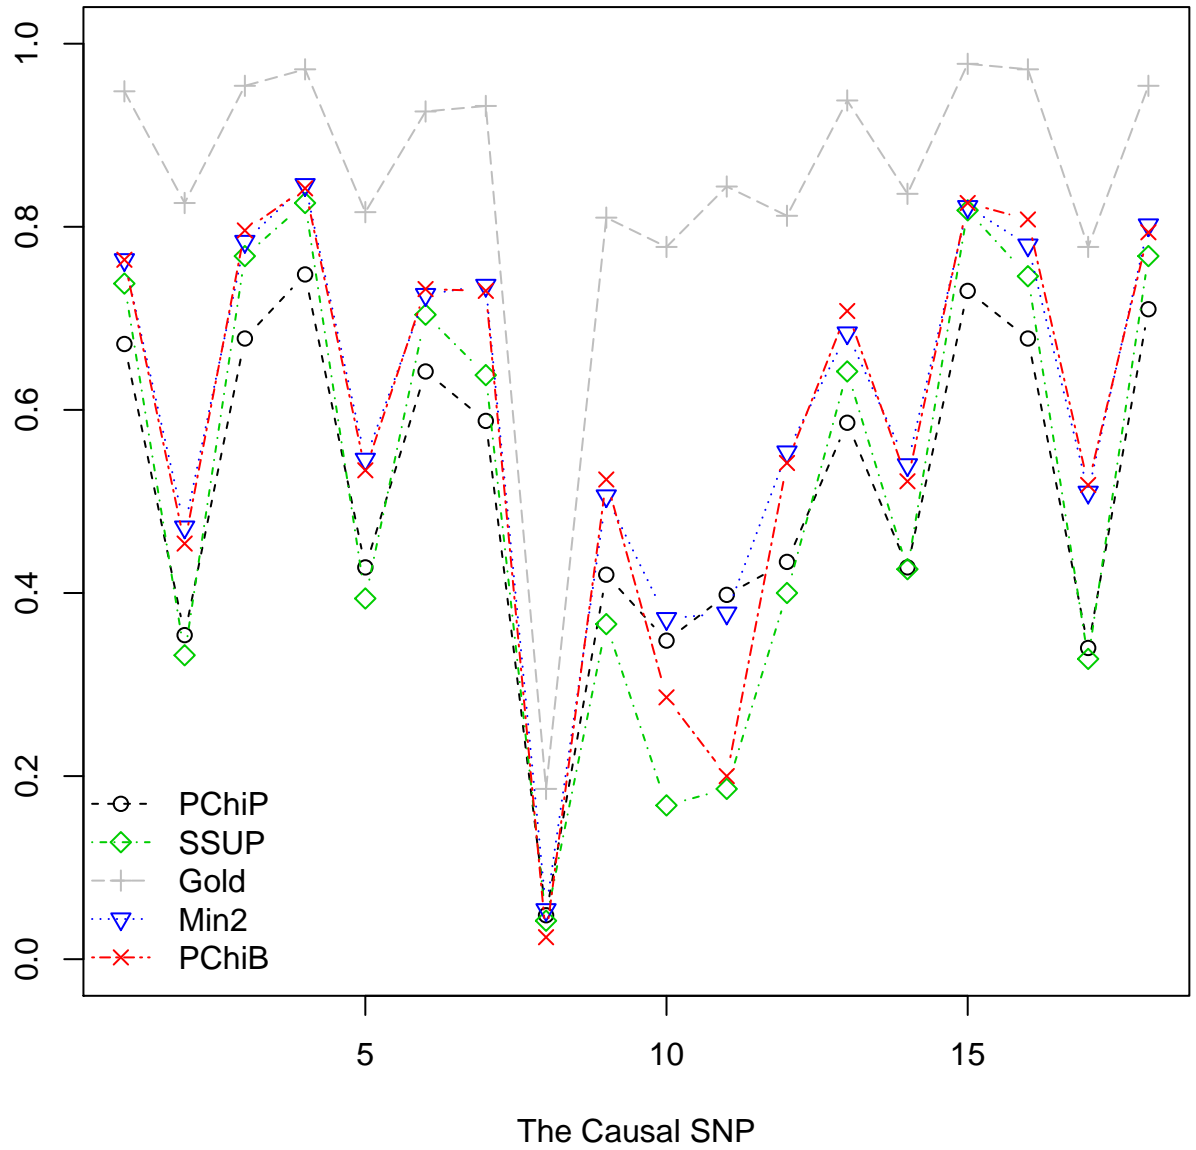

Figure 4a. Empirical powers (based on 17 SNPs excluding the causal SNP) of GOLD, PChiP, SSUP, PChiB and Min2. Each SNP is treated as the causal locus in turn, which has a recessive effect with simulated odds ratios 1.5 and  $F_{st}=0$  based on 1000 controls, 1000 cases and 500 iterations.

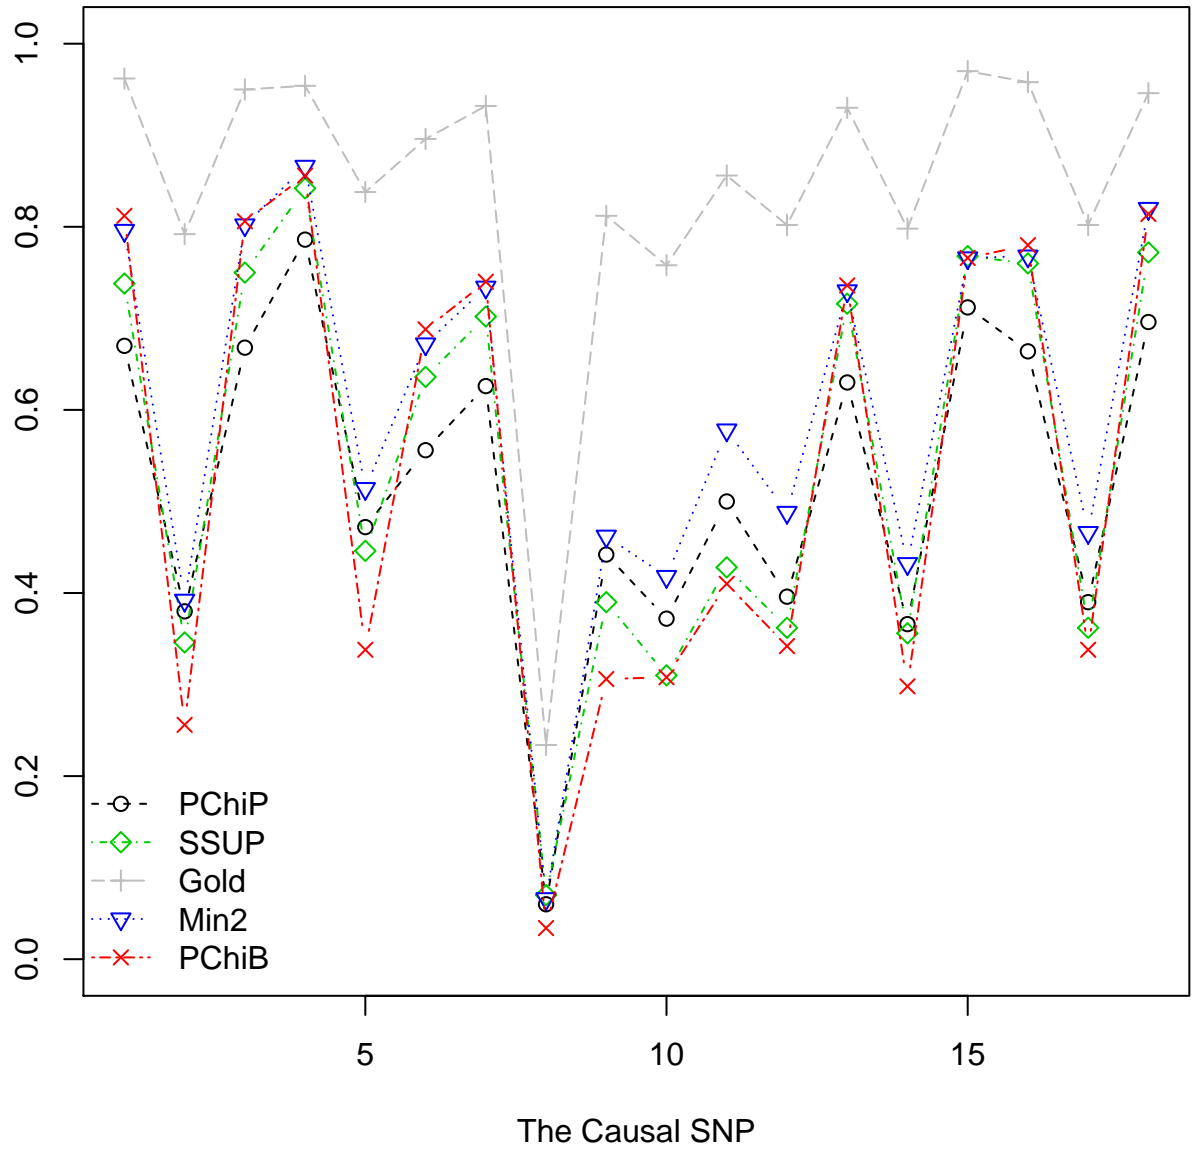

Figure 4b. Empirical powers(based on 5 tag labeled SNPs) of GOLD, PChiP, SSUP, PChiB and Min2. Each SNP is treated as the causal locus in turn, which has a recessive effect with simulated odds ratios 1.5 and  $F_{st}=0$  based on 1000 controls, 1000 cases and 500 iterations.

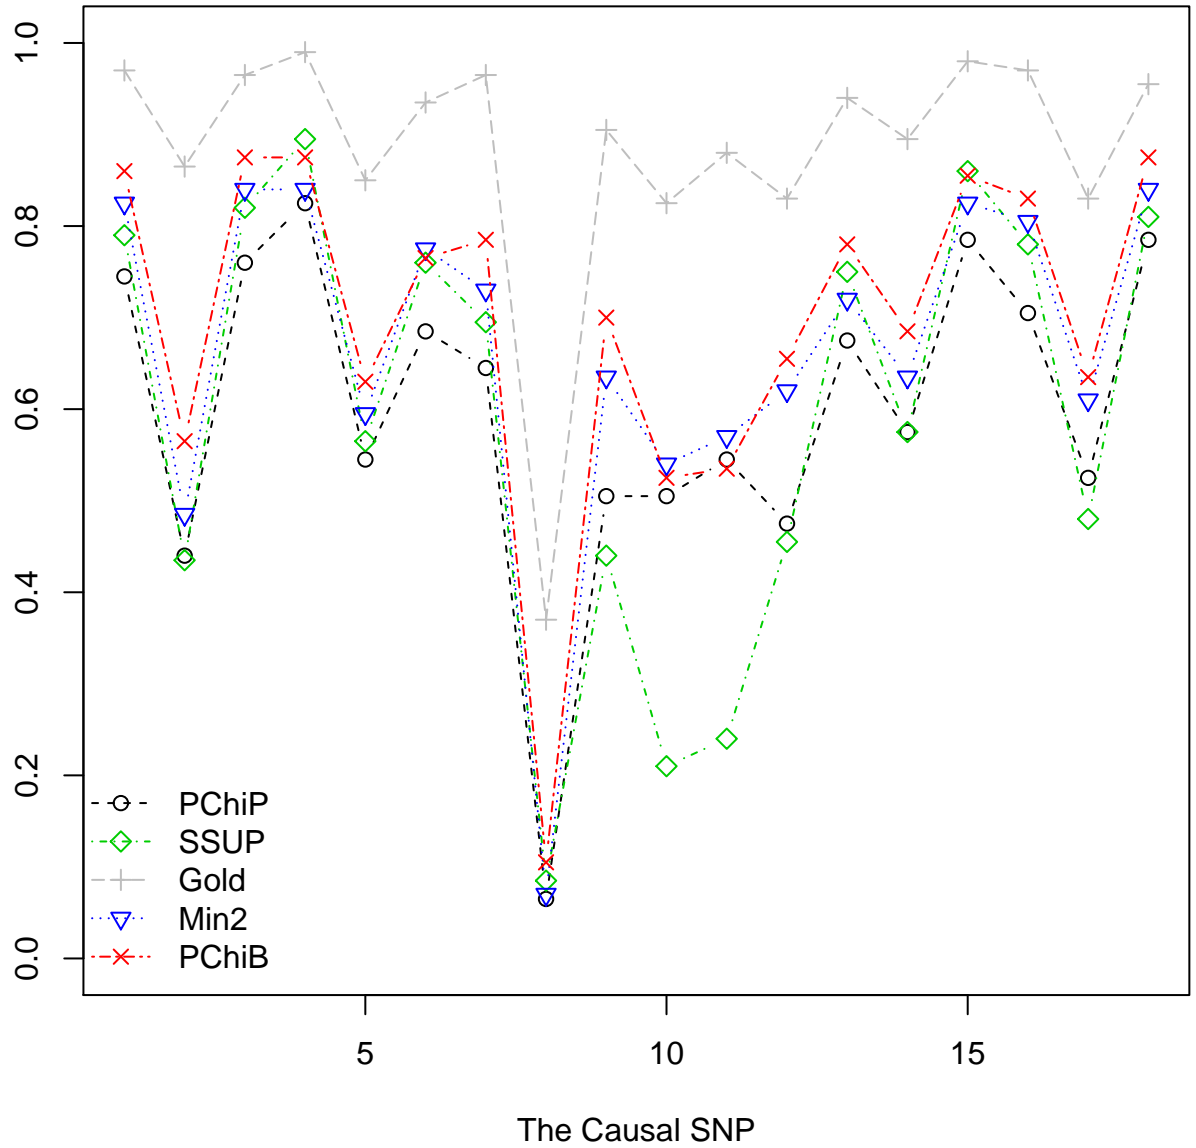

Figure 5a. Empirical powers(based on 17 SNPs excluding the causal SNP) of GOLD, PChiP, SSUP, PChiB and Min2. Each SNP is treated as the causal locus in turn, which has a recessive effect with simulated odds ratios 1.5 and  $F_{st}=0.5\log(2.0)$  based on 1000 controls,1000 cases and 500 iterations.

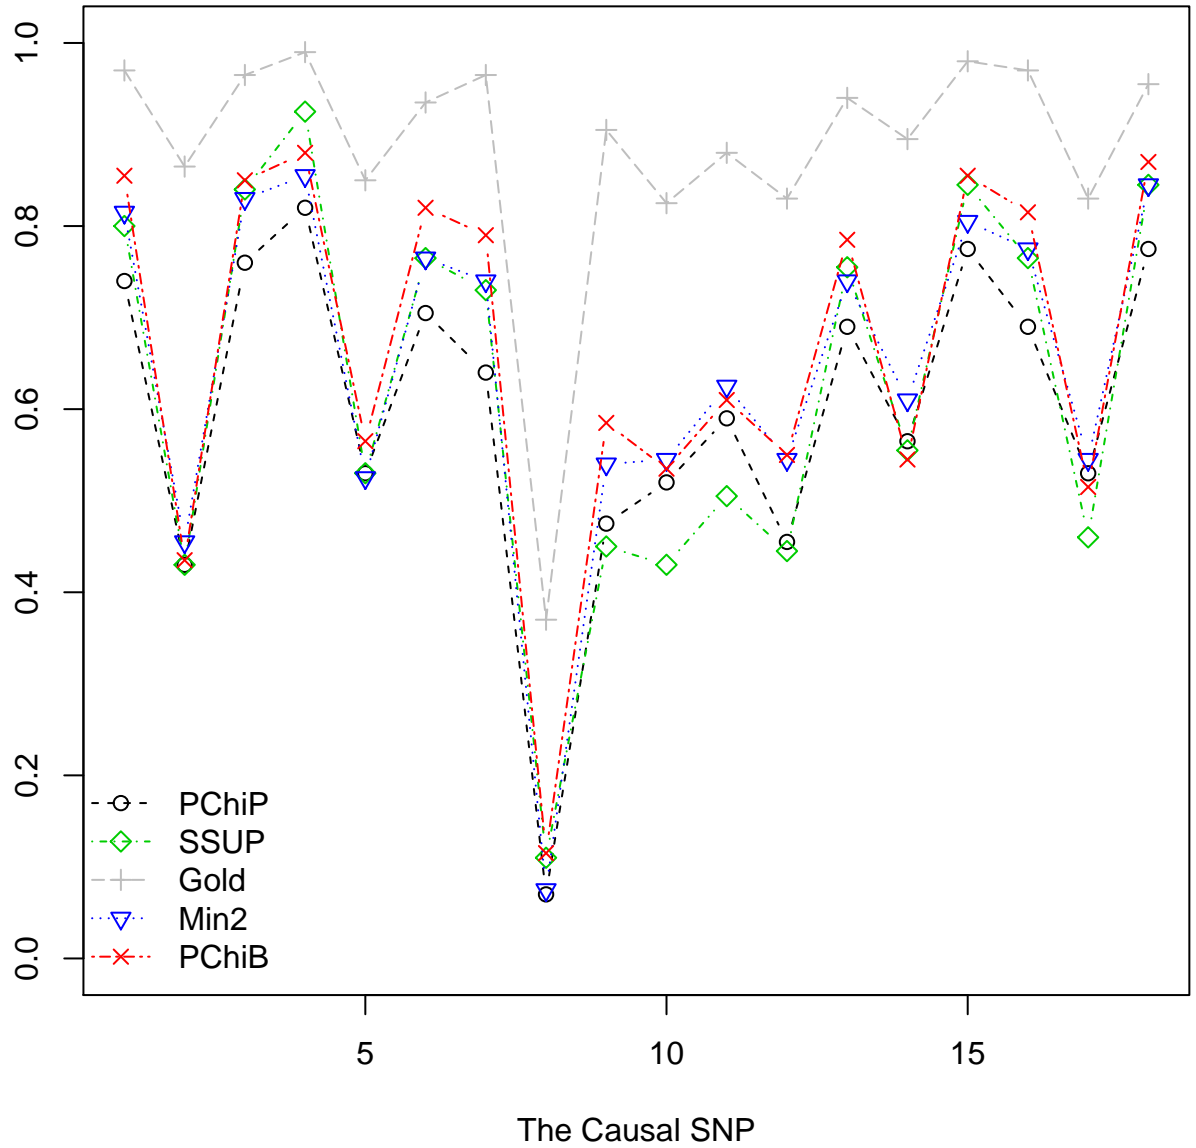

Figure 5b. Empirical powers(based on 5 tag labeled SNPs) of GOLD, PChiP, SSUP, PChiB and Min2. Each SNP is treated as the causal locus in turn, which has a recessive effect with simulated odds ratios 1.5 and  $F_{st}=0.5\log(2.0)$  based on 1000 controls,1000 cases and 500 iterations.

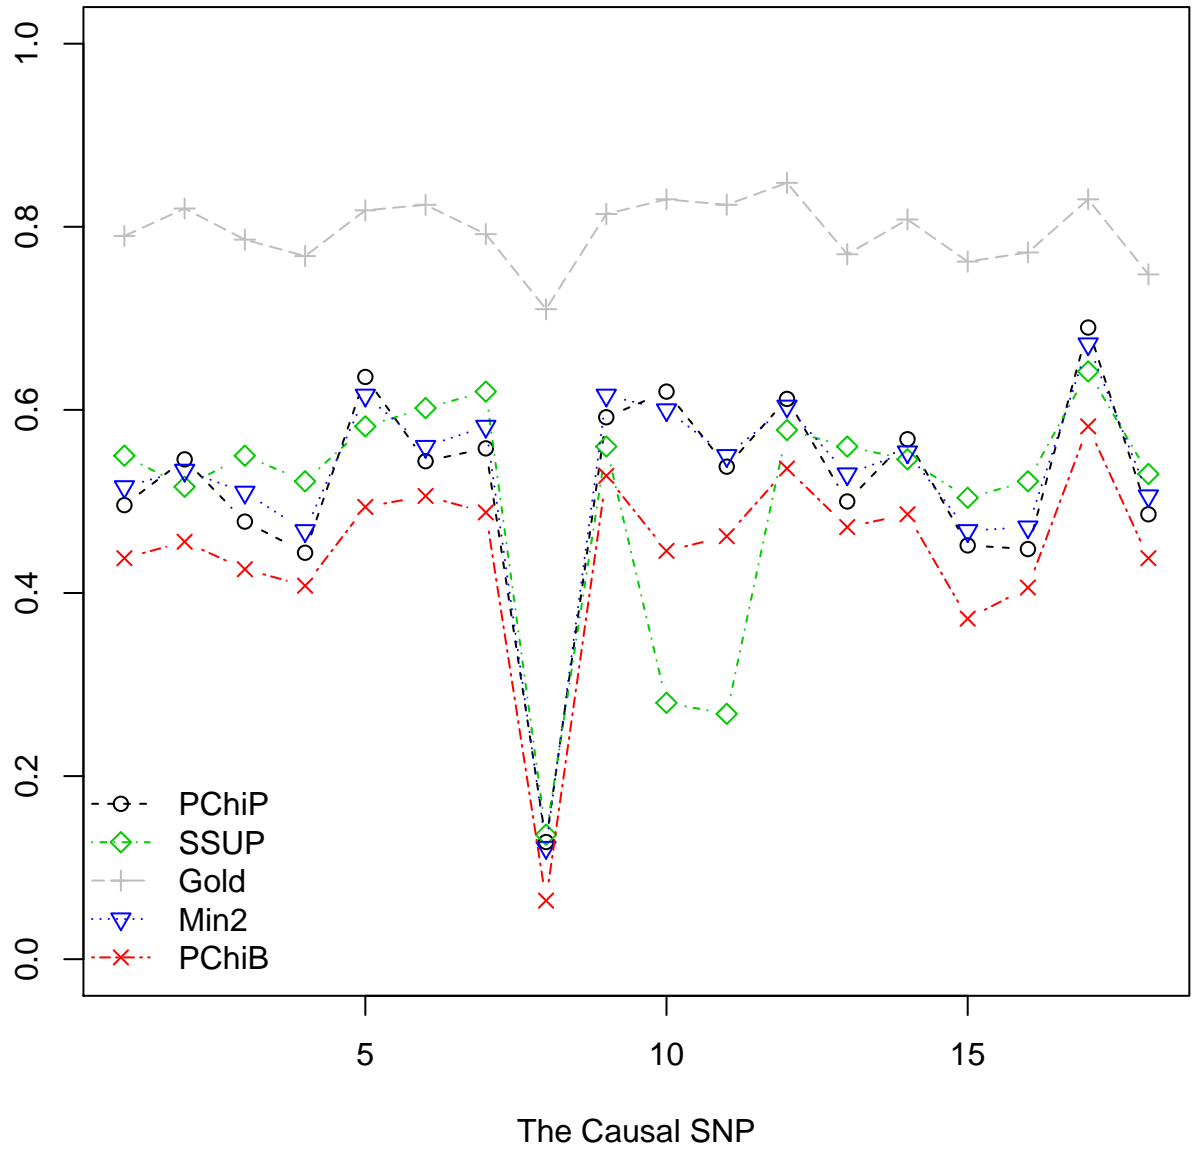

Figure 6a. Empirical powers (based on 17 SNPs excluding the causal SNP) of GOLD, PChiP, SSUP, PChiB and Min2. Each SNP is treated as the causal locus in turn, which has a dominant effect with simulated odds ratios 1.3 and  $F_{st}=0$  based on 1000 controls, 1000 cases and 500 iterations.

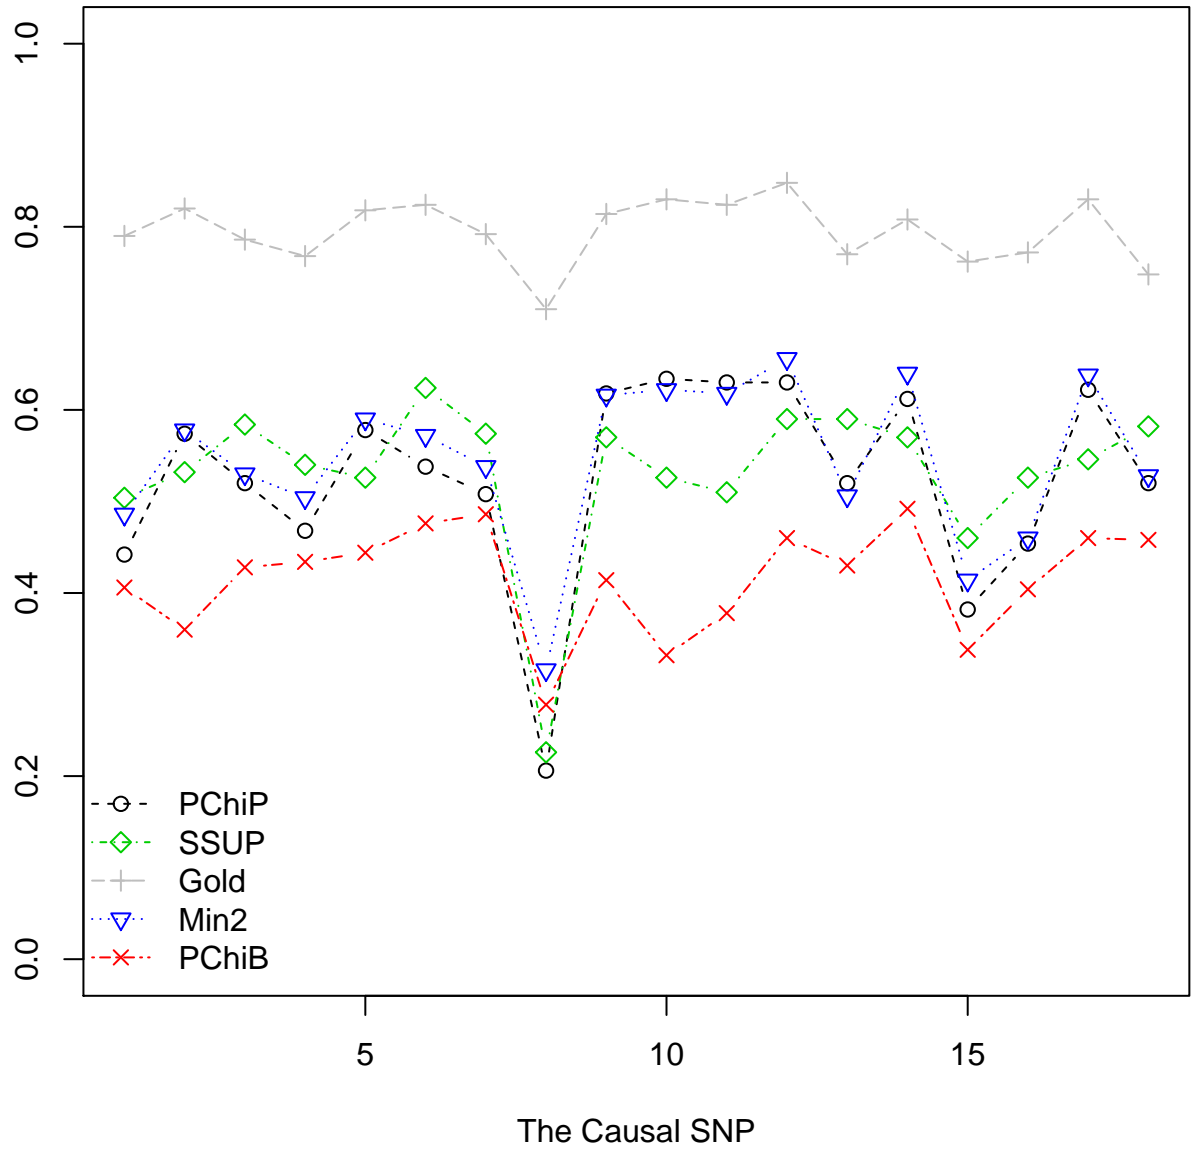

Figure 6b. Empirical powers(based on 5 tag labeled SNPs) of GOLD, PChiP, SSUP, PChiB and Min2. Each SNP is treated as the causal locus in turn, which has a dominant effect with simulated odds ratios 1.3 and  $F_{st}=0$  based on 1000 controls, 1000 cases and 500 iterations.



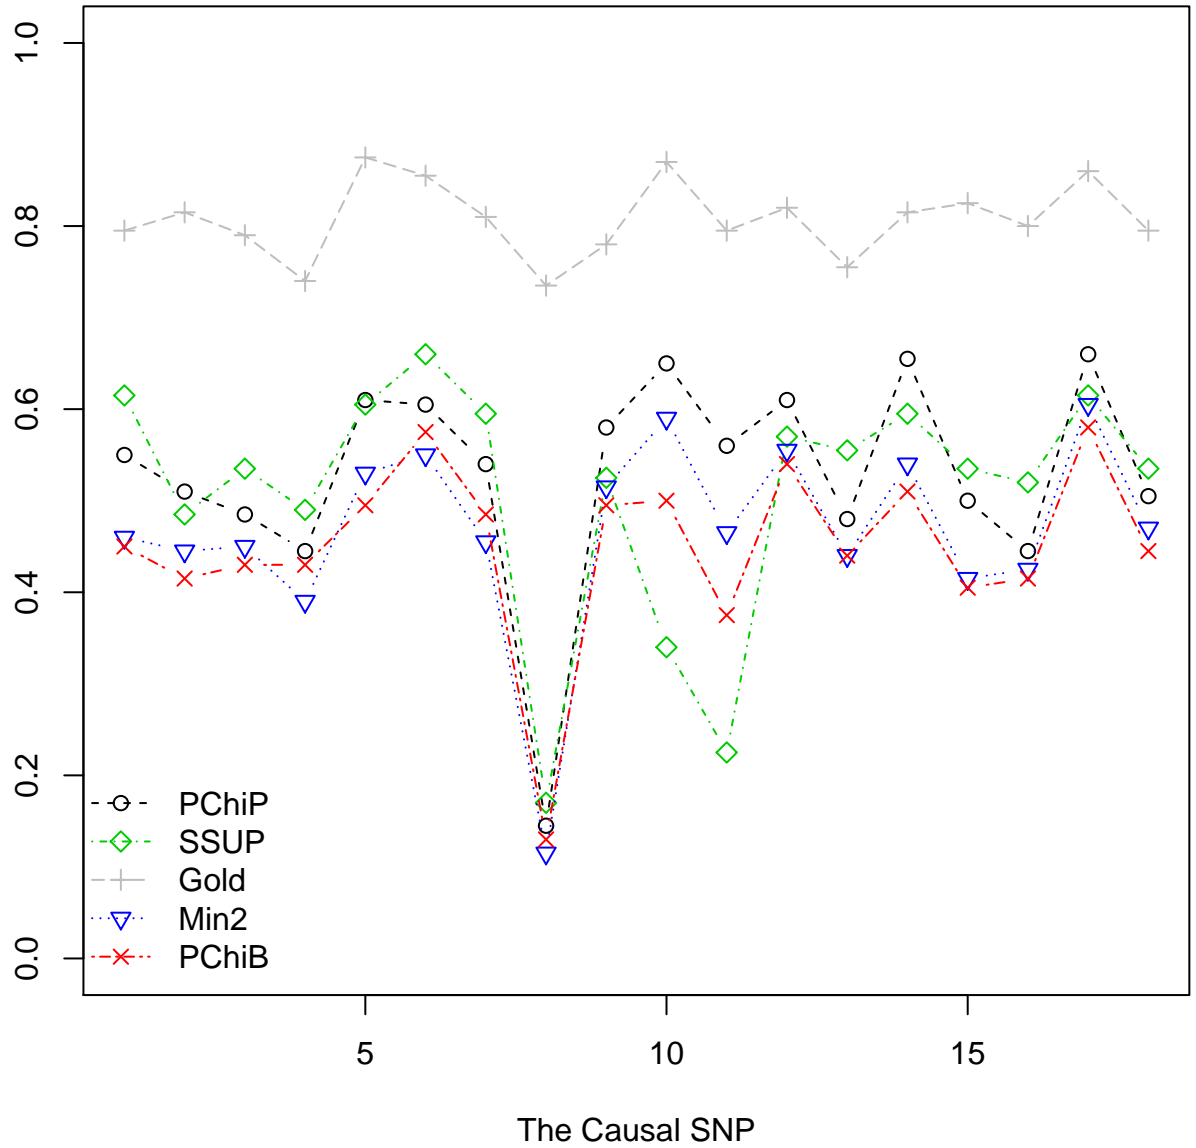

Figure 7a. Empirical powers(based on 17 SNPs excluding the causal SNP) of GOLD, PChiP, SSUP, PChiB and Min2. Each SNP is treated as the causal locus in turn, which has a dominant effect with simulated odds ratios 1.3 and  $F_{st}=0.5\log(2.0)$  based on 1000 controls,1000 cases and 500 iterations.

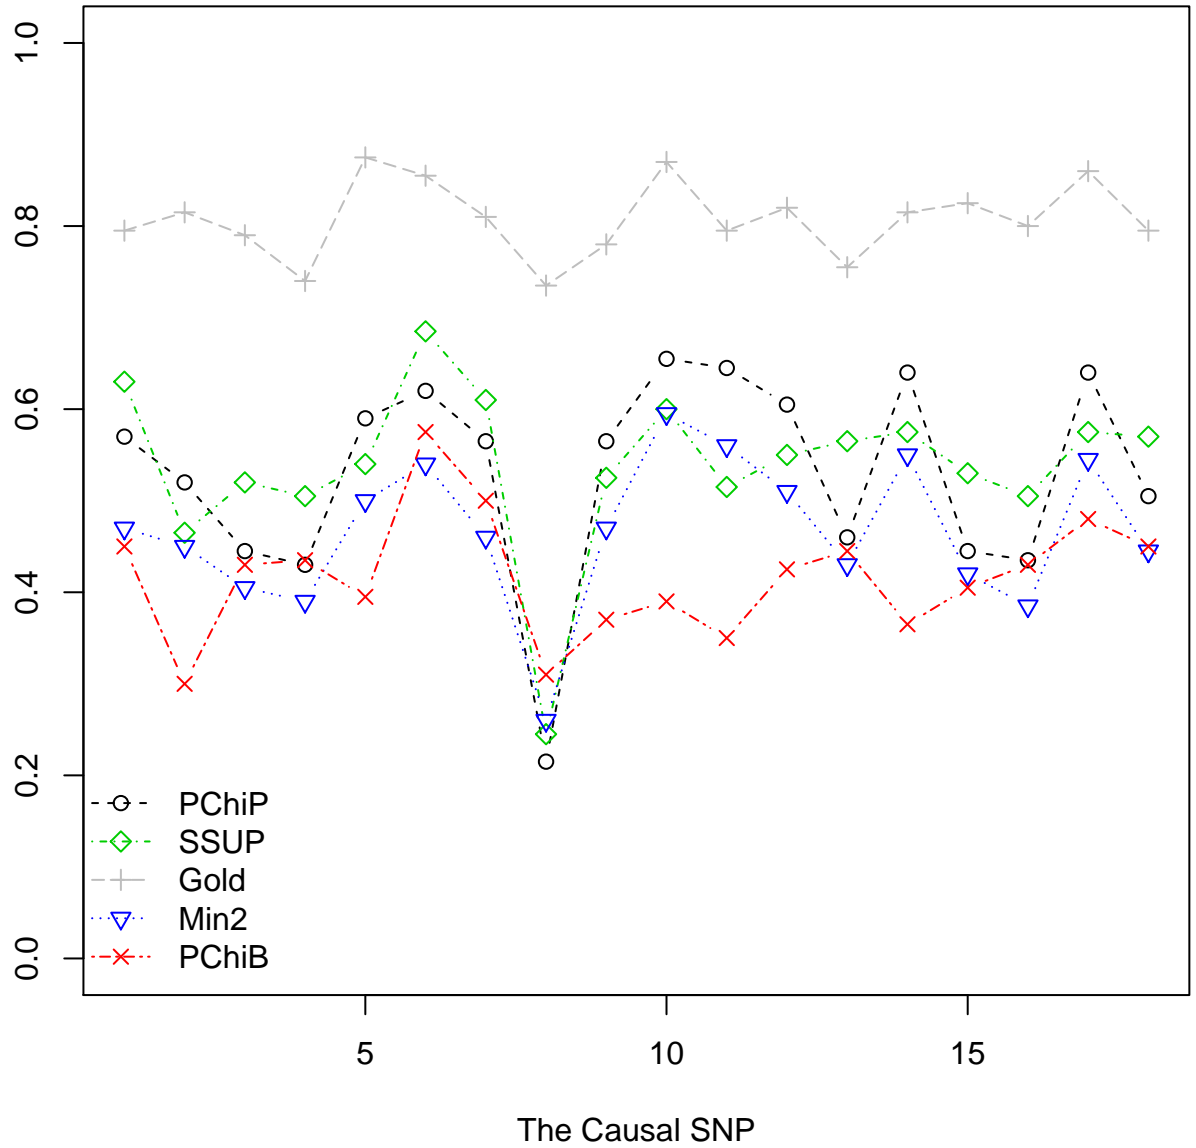

Figure 7b. Empirical powers(based on 5 tag labeled SNPs) of GOLD, PChiP, SSUP, PChiB and Min2. Each SNP is treated as the causal locus in turn, which has a dominant effect with simulated odds ratios 1.3 and  $F_{st}=0.5\log(2.0)$  based on 1000 controls,1000 cases and 500 iterations.

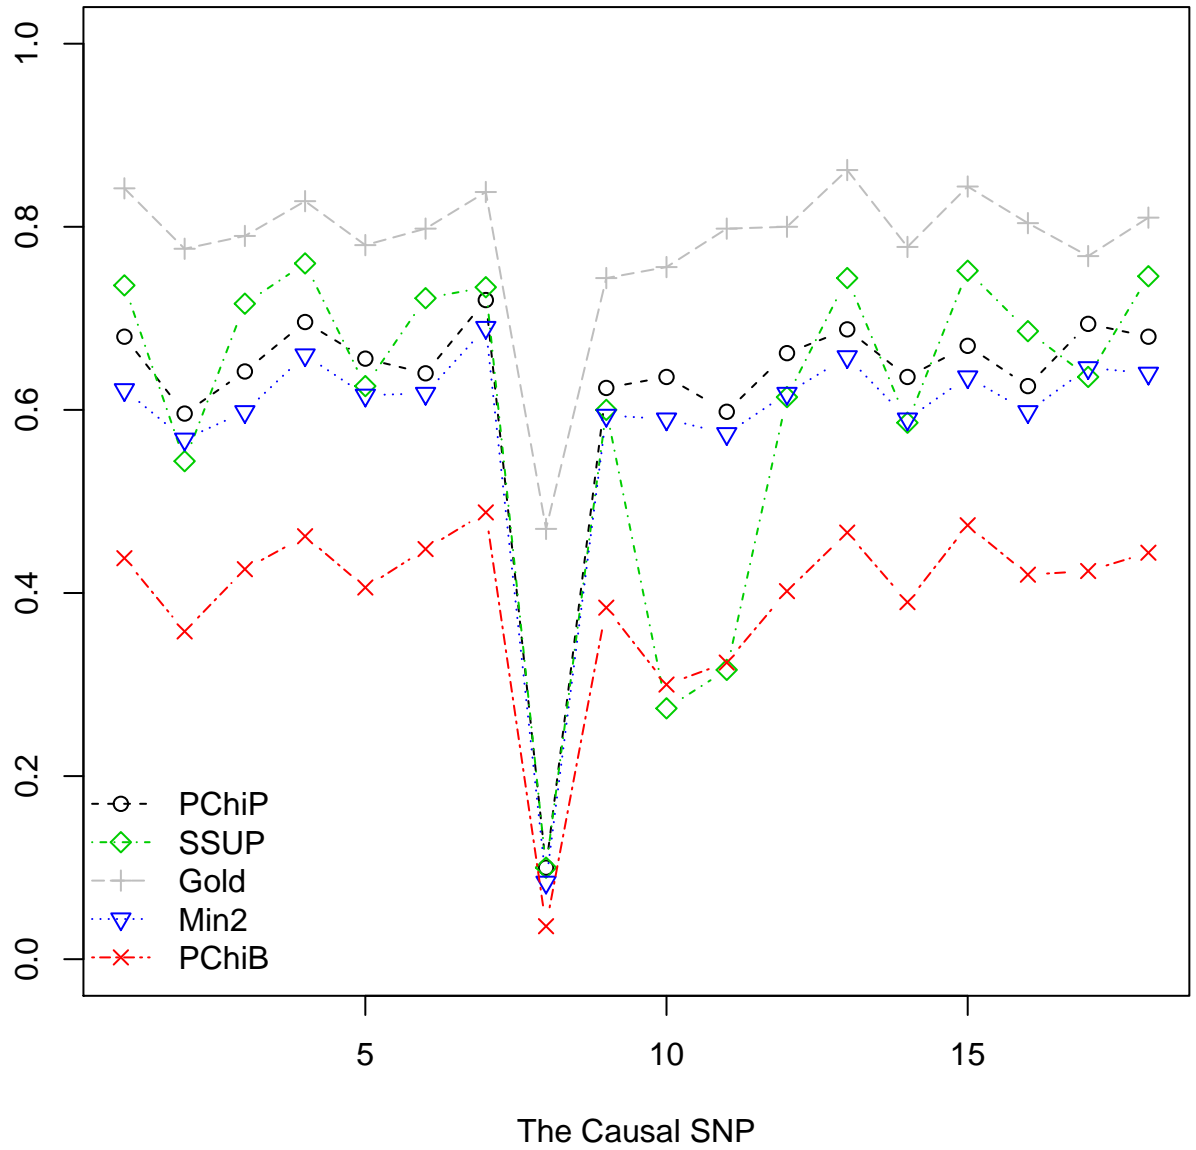

Figure 8a. Empirical powers (based on 17 SNPs excluding the causal SNP) of GOLD, PChiP, SSUP, PChiB and Min2. Each SNP is treated as the causal locus in turn, which has a multiplicative effect with simulated odds ratios 1.2 and  $F_{st}=0$  based on 1000 controls, 1000 cases and 500 iterations.

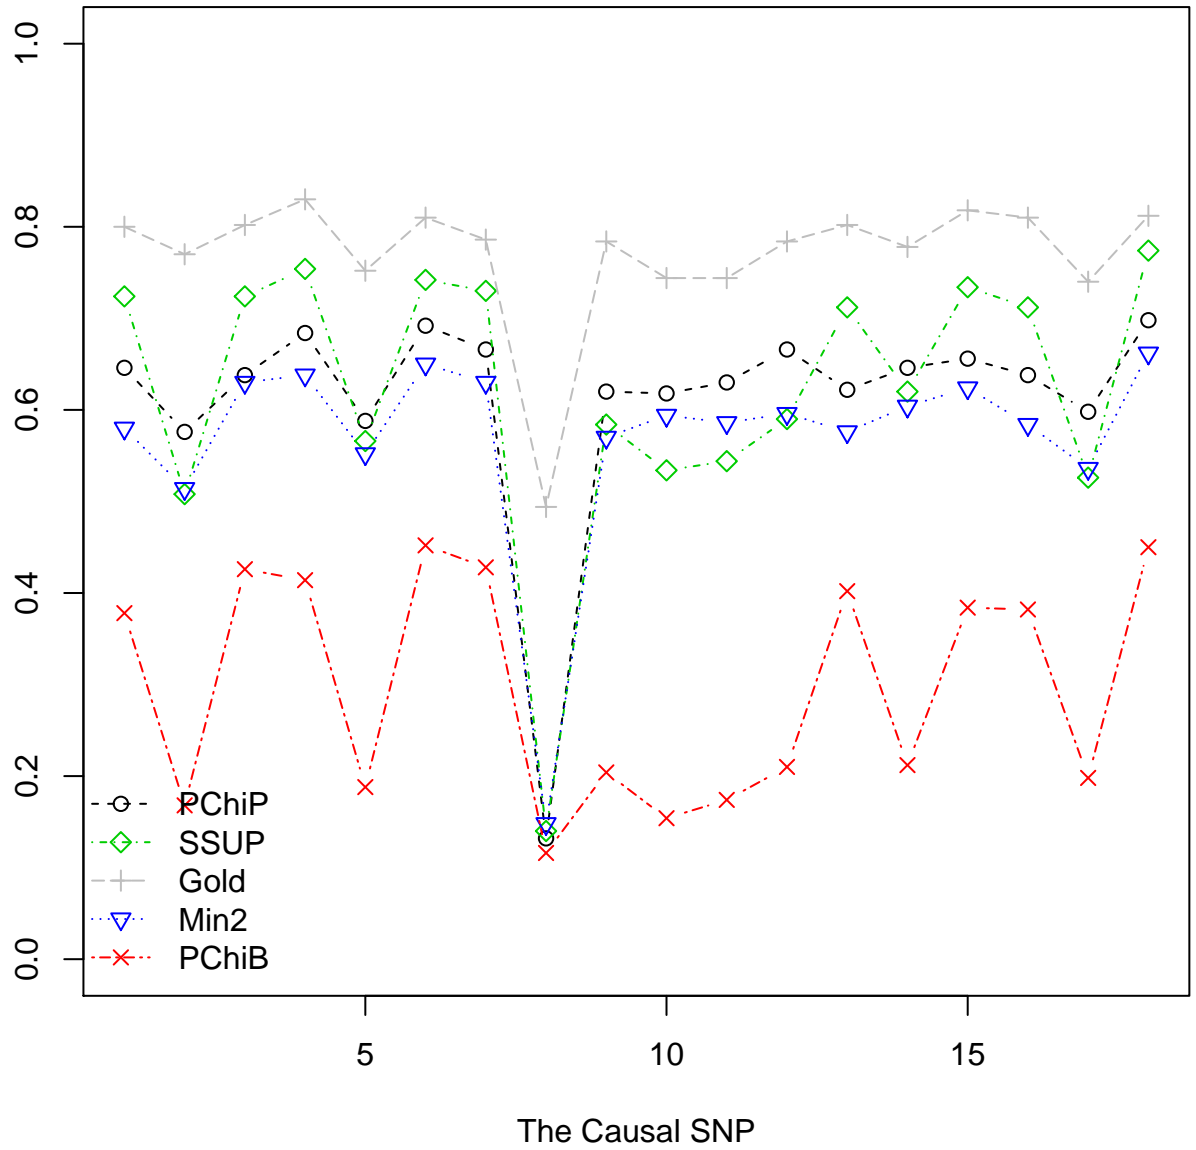

Figure 8b. Empirical powers(based on 5 tag labeled SNPs) of GOLD, PChiP, SSUP, PChiB and Min2. Each SNP is treated as the causal locus in turn, which has a multiplicative effect with simulated odds ratios 1.2 and  $F_{st}=0$  based on 1000 controls, 1000 cases and 500 iterations.

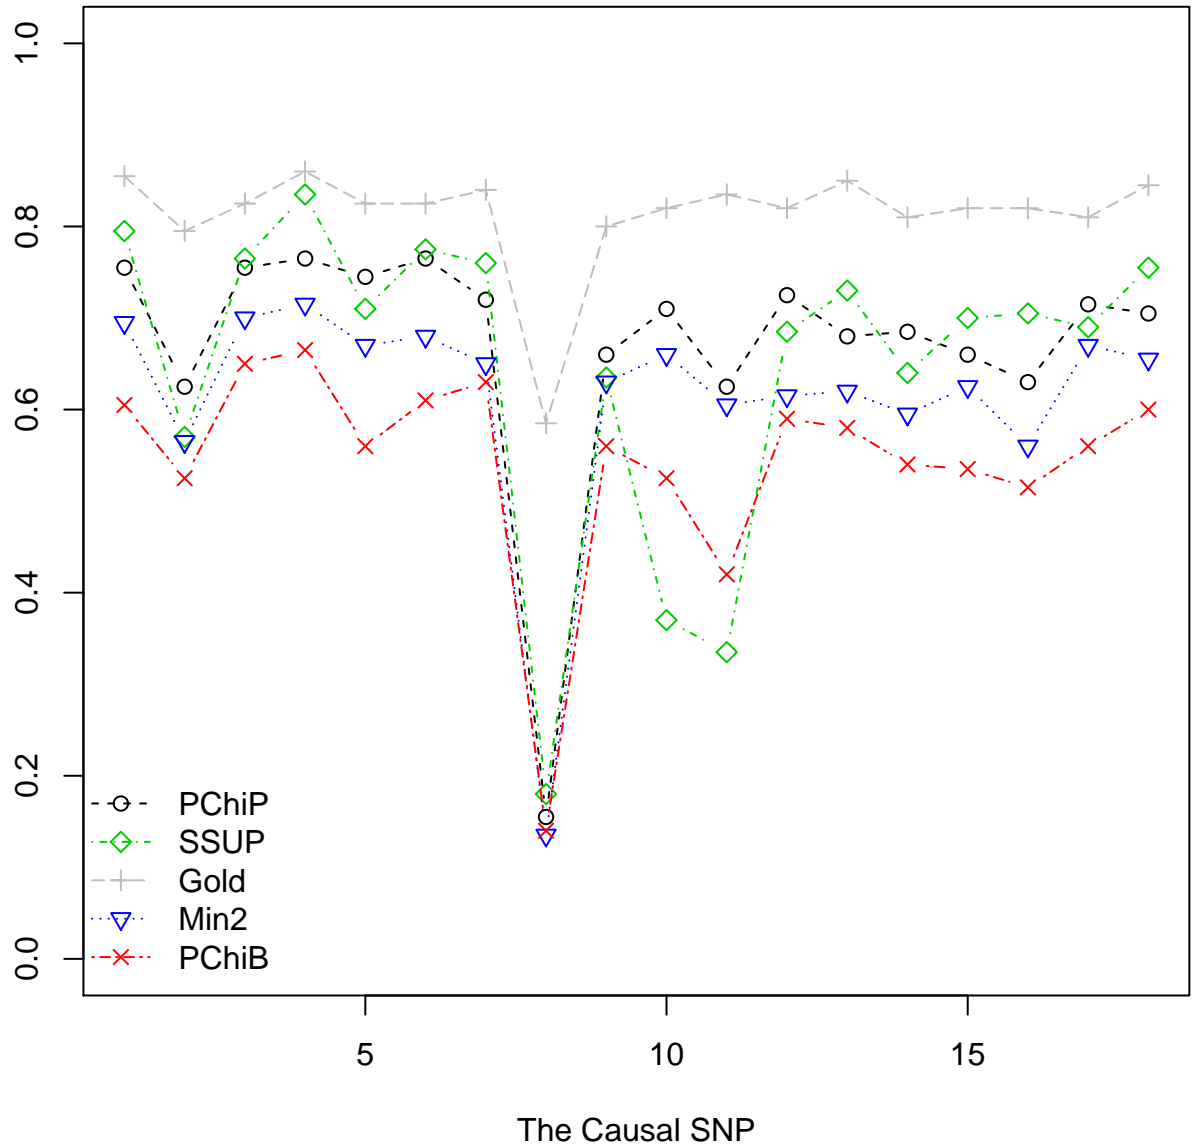

Figure 9a. Empirical powers(based on 17 SNPs excluding the causal SNP) of GOLD, PChiP, SSUP, PChiB and Min2. Each SNP is treated as the causal locus in turn, which has a multiplicative effect with simulated odds ratios 1.2 and  $F_{st}=0.5\log(2.0)$  based on 1000 controls,1000 cases and 500 iterations.

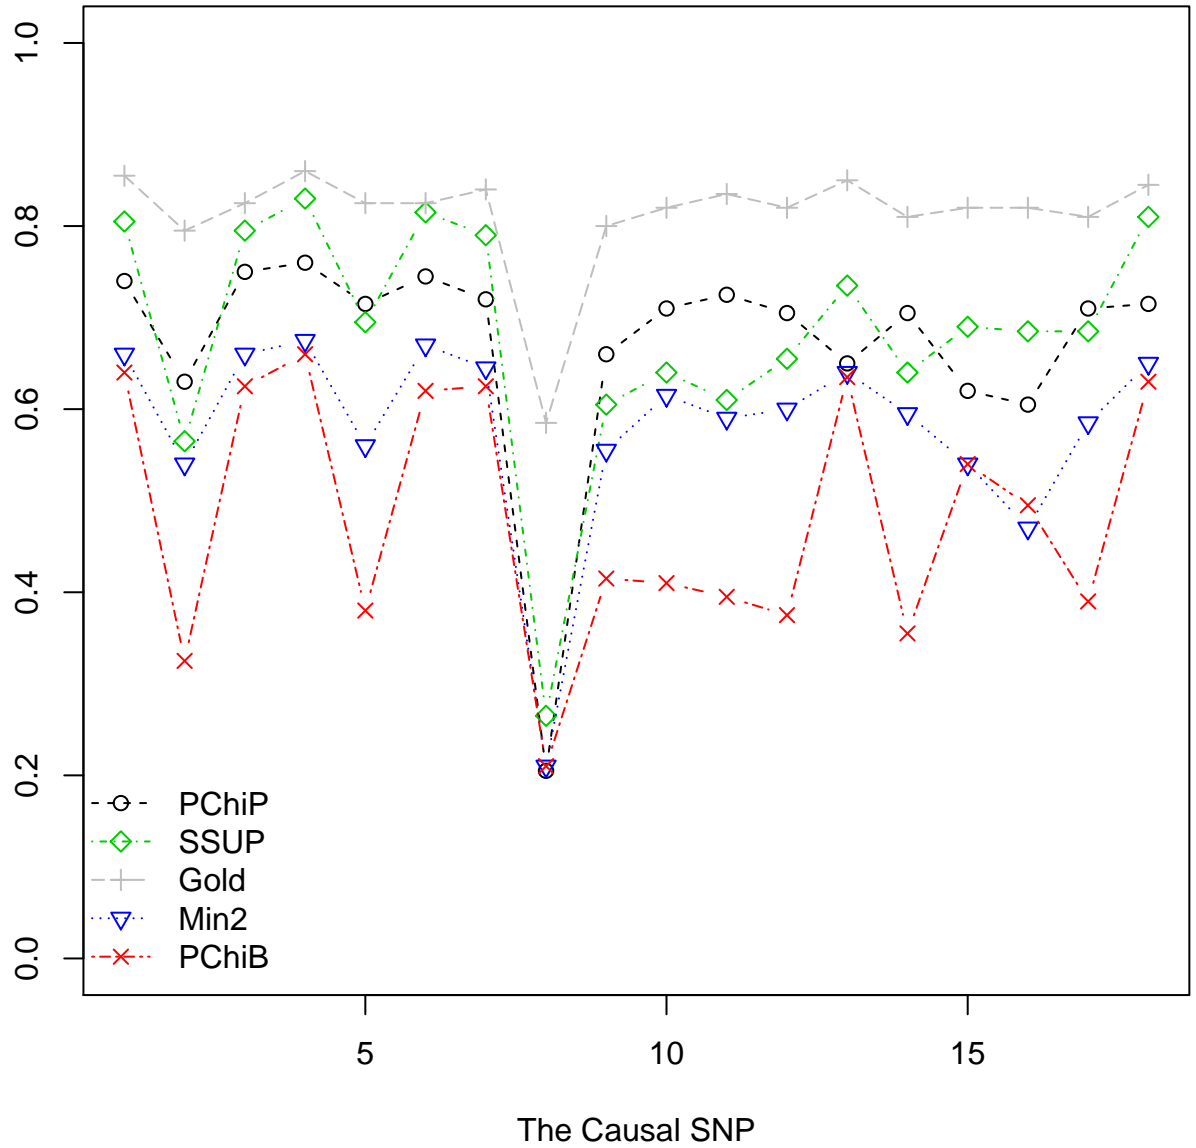

Figure 9b. Empirical powers(based on 5 tag labeled SNPs) of GOLD, PChiP, SSUP, PChiB and Min2. Each SNP is treated as the causal locus in turn, which has a multiplicative effect with simulated odds ratios 1.2 and  $F_{st}=0.5\log(2.0)$  based on 1000 controls,1000 cases and 500 iterations.
